# Supplementary material for: Boosted ammonium production by single cobalt atom catalysts with high Faradic efficiencies
Source: PubMed Central journal article supplement — Proc Natl Acad Sci U S A. 2022 Jul 12;119(29):e2123450119. doi: 10.1073/pnas.2123450119 (PMC9303948; doi:10.1073/pnas.2123450119), 2022-07-12
Supplement: pnas.2123450119.sapp.pdf [file pnas.2123450119.sapp.pdf]

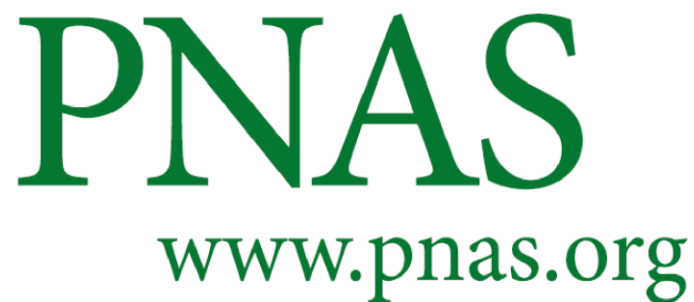

Supplementary Information for

**Boosted ammonium production by single cobalt atom catalysts with high Faradic efficiencies**

Jiacheng Li, Miao Li\*, Ning An, Shuo Zhang, Qinan Song, Yilin Yang, Jing Li, Xiang Liu

School of Environment, Tsinghua University, 30# Shuangqing Road, Hai Dian District, Beijing, 100086, China.

\*E-mail: [miaoli@tsinghua.edu.cn](mailto:miaoli@tsinghua.edu.cn); Tel.: 86-10-62772485.

**This PDF file includes:**

Figures S1 to S15

Table S1 to S3

References for SI reference citations

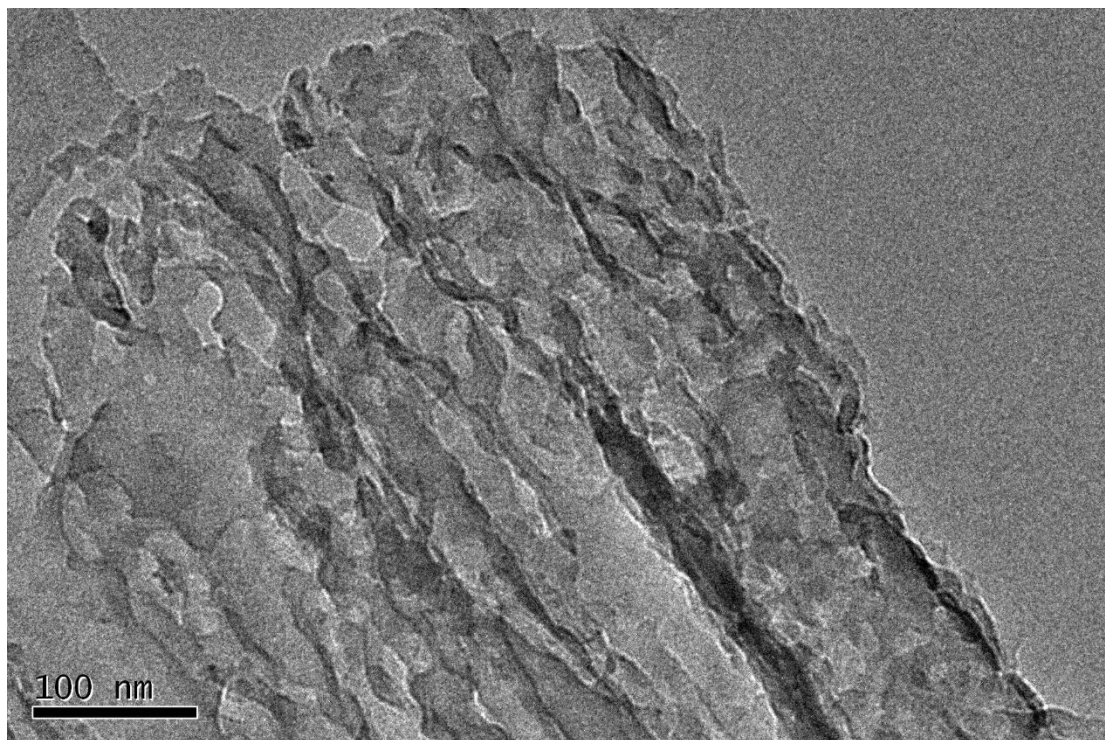

**Supplementary Figure 1.** TEM images of Co-CN.

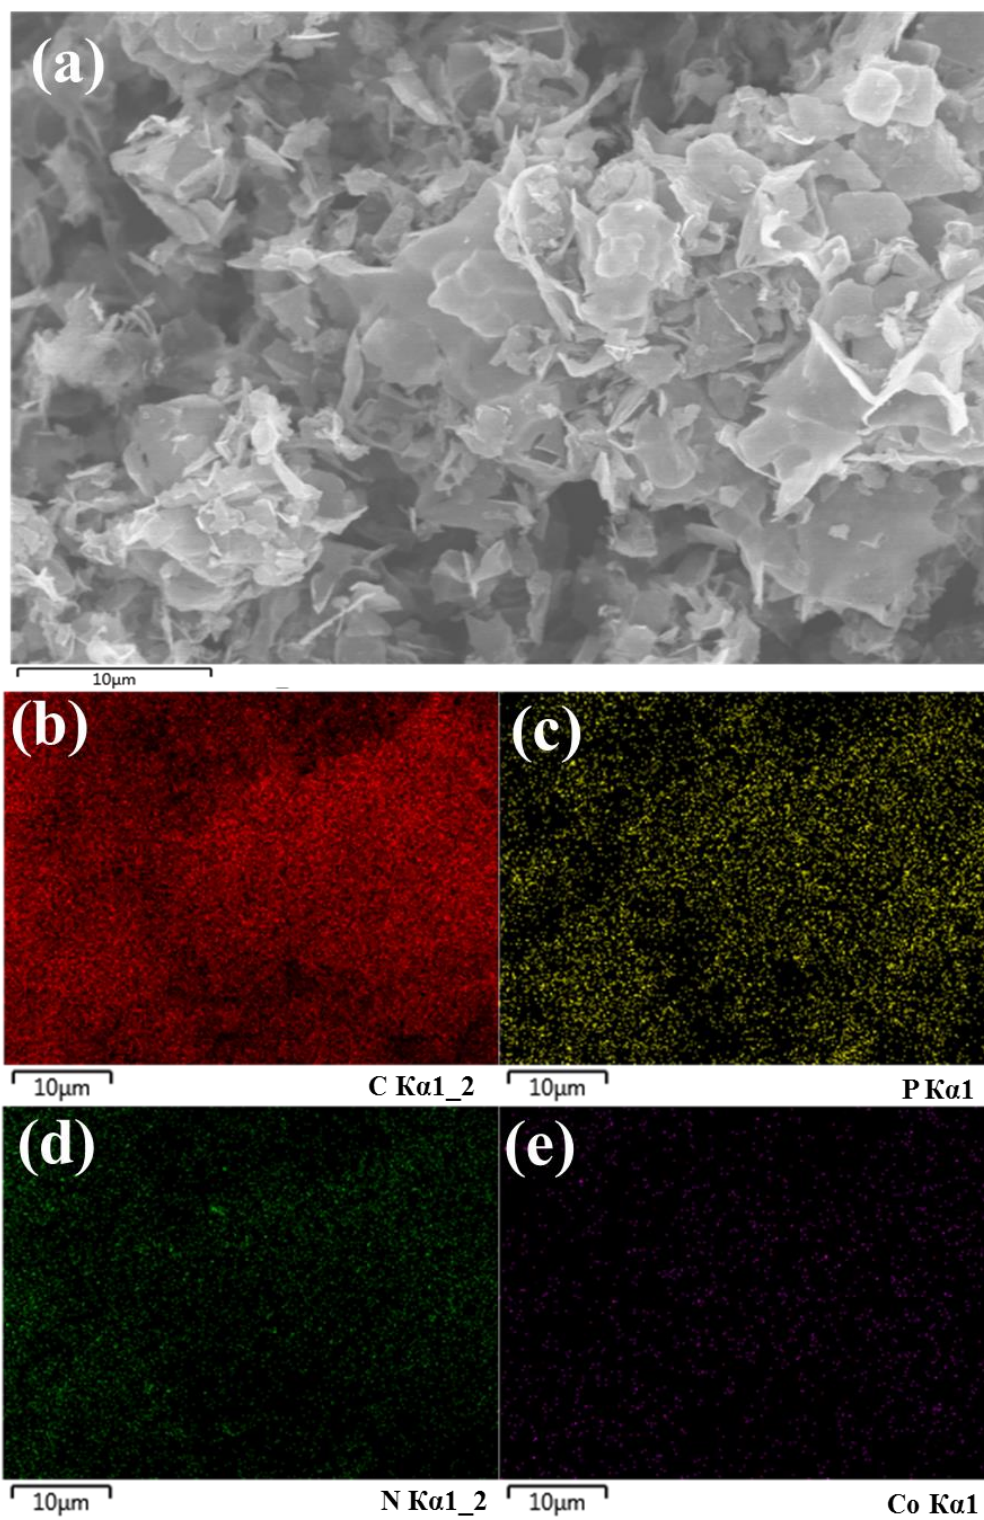

**Supplementary Figure 2.** SEM image of Co-CNP and its energy-dispersive spectroscopy (EDS): C (red), P (blue), N (green), and Co (purple)

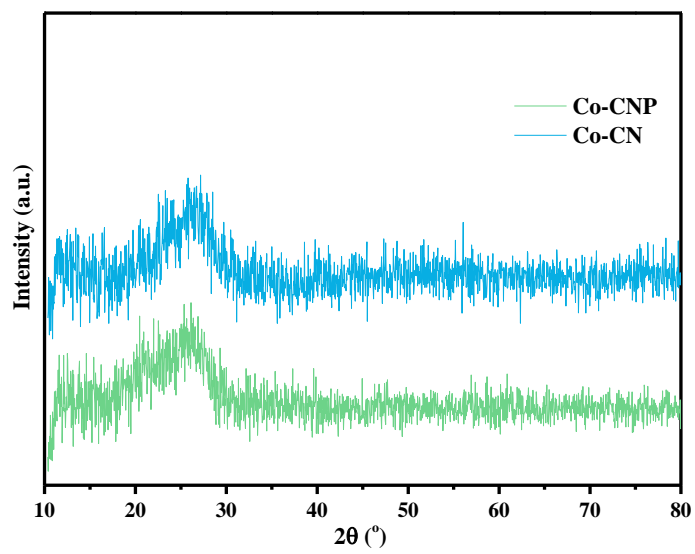

**Supplementary Figure 3.** XRD patterns of Co-CN and Co-CNP.

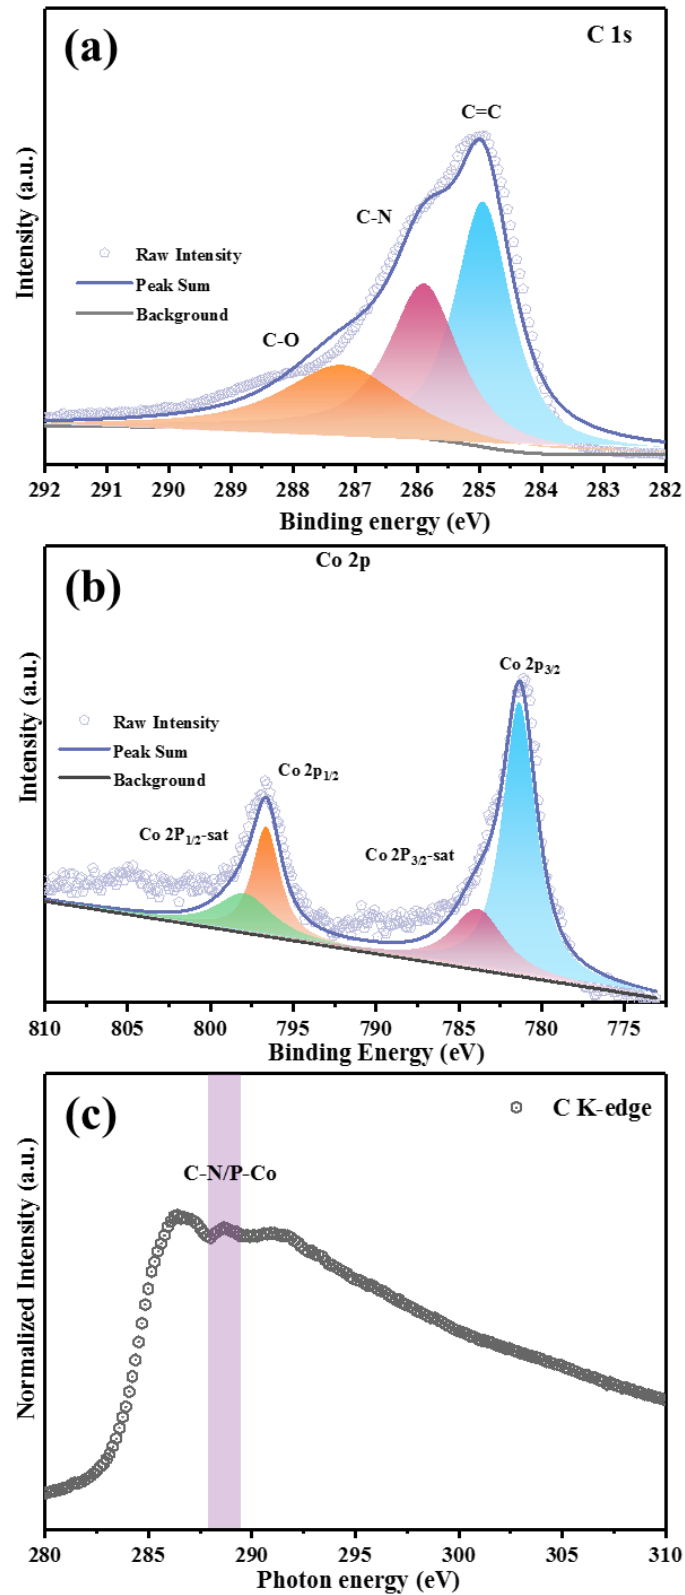

**Supplementary Figure 4.** Deconvoluted XPS spectrum of (a) C 1s and (b) Co 2p in Co-CNP, (c) the C K-edge XANES results of Co-CNP

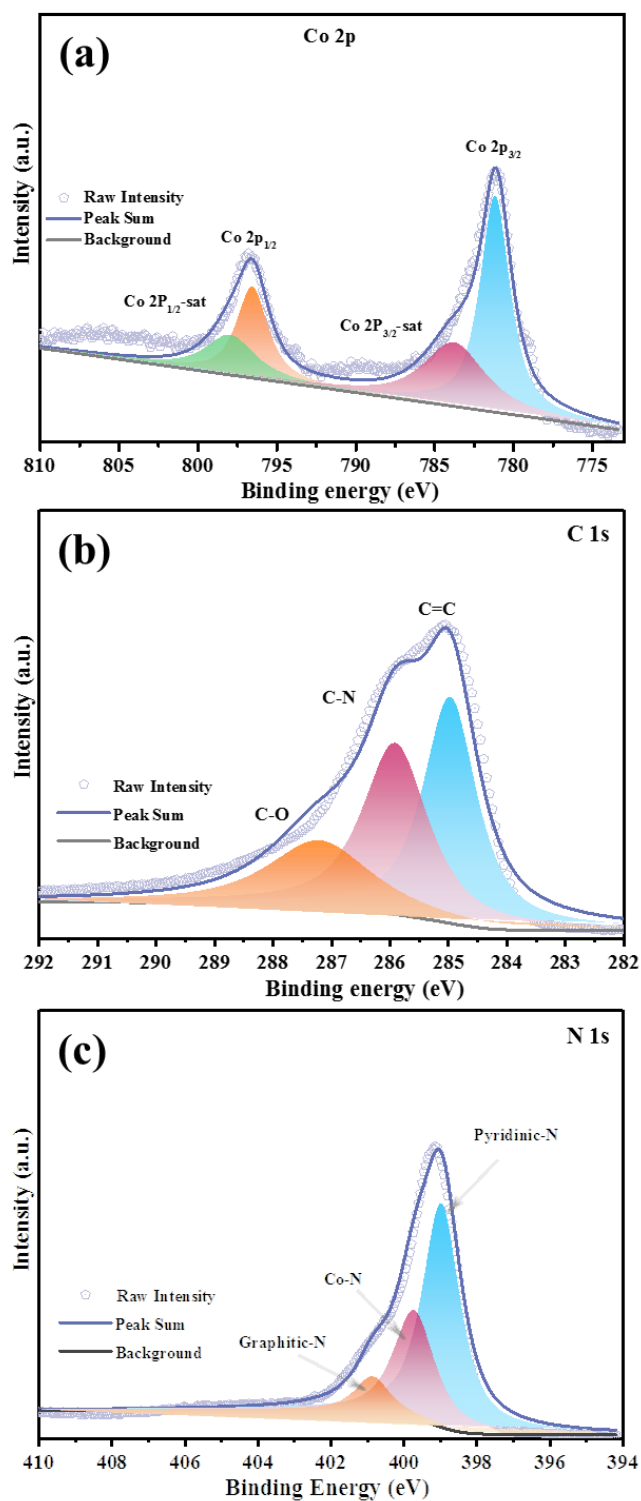

**Supplementary Figure 5.** Deconvoluted XPS spectra of (a) Co 2p, (b) C 1s, and (c) N 1s in Co-CN SAC with a high resolution.

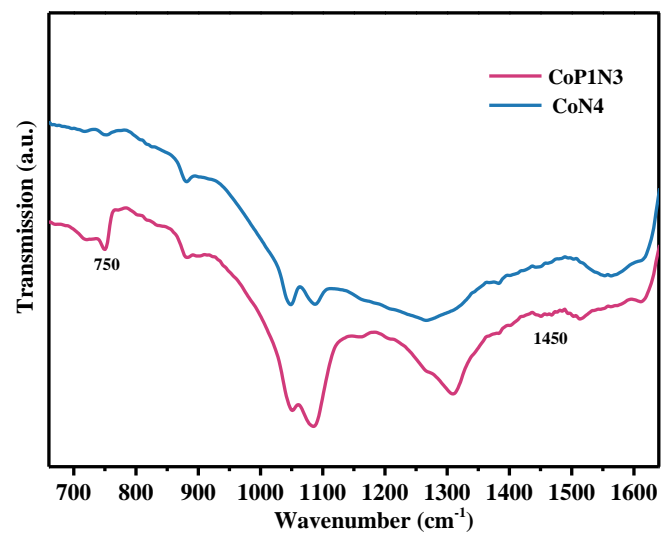

**Supplementary Figure 6.** FTIR spectra of the CoP1N3 and CoN4 samples.

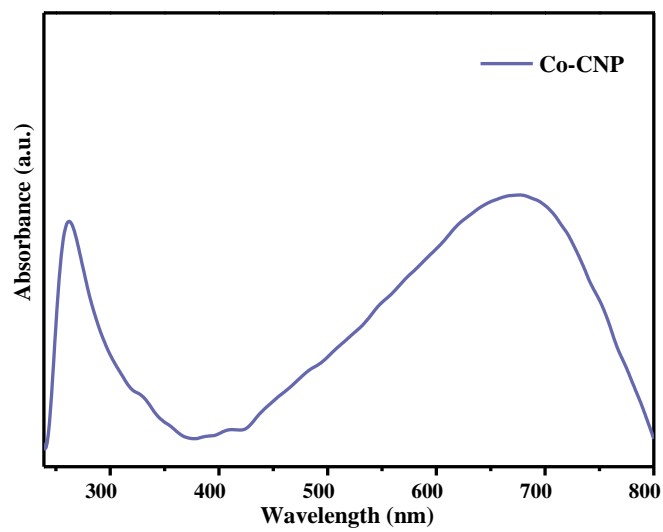

**Supplementary Figure 7.** UV-vis spectra of the Co-CNP samples.



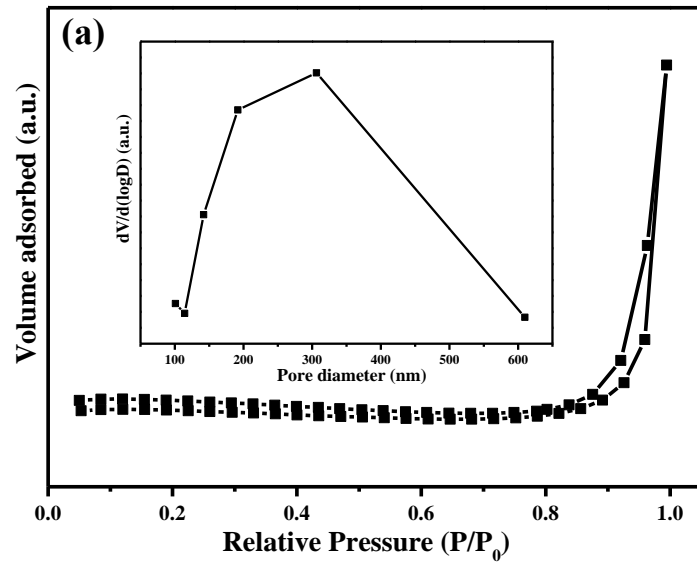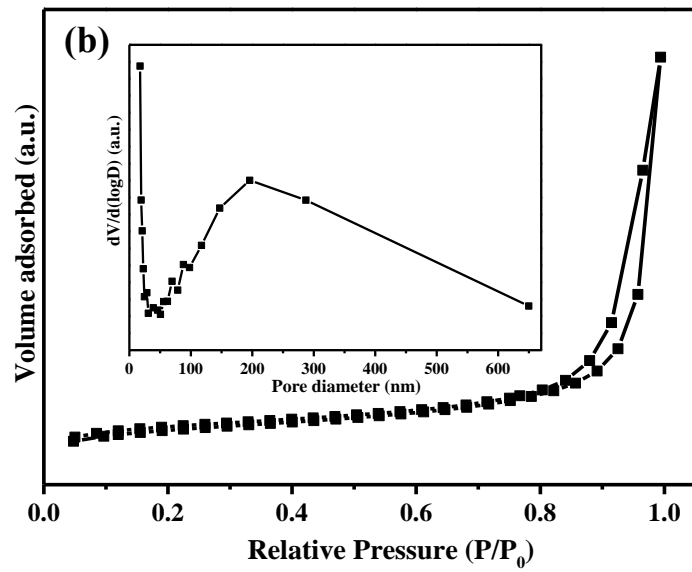

**Supplementary Figure 8.** N<sub>2</sub>-sorption and the corresponding pore size distributions in the (a) Co-CN, (b) Co-CNP samples.

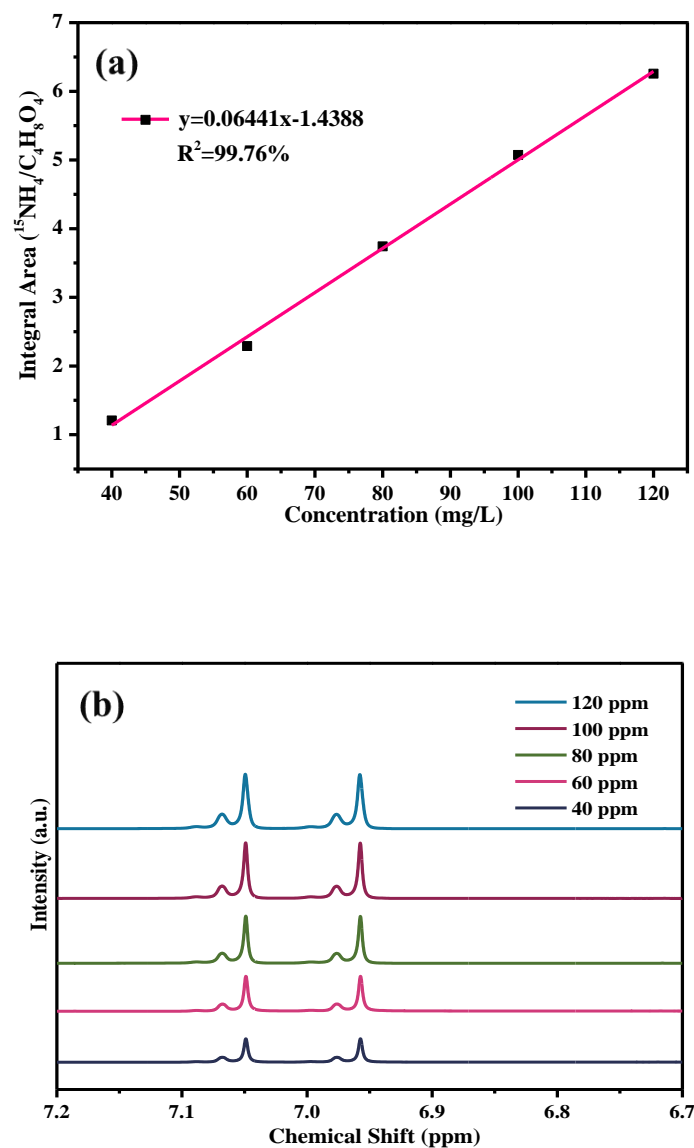

**Supplementary Figure 9.** (a)  $^1\text{H}$  NMR spectra (800 MHz) of standard  $(^{15}\text{NH}_4)_2\text{SO}_4$  samples with different concentrations. (b) linear fitting of the integral area ratio ( $^{15}\text{N}-^{15}\text{NH}_4^+/\text{C}_4\text{H}_4\text{O}_4$ ) and  $^{15}\text{N}-^{15}\text{NH}_4^+$  concentration.

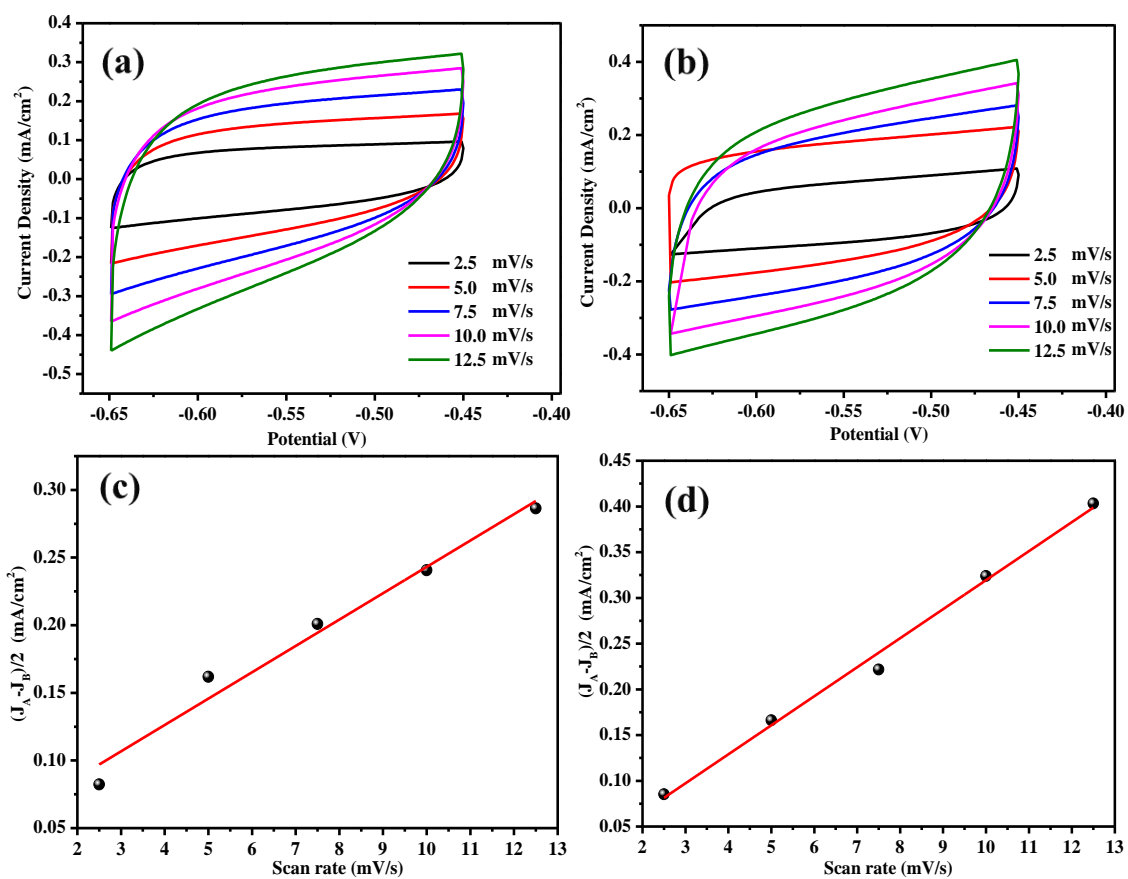

**Supplementary Figure 10.** The CV curves of Co-CN (a) and Co-CNP (b) at different scan rates in the non-Faradaic region; The capacitive current differences of  $(J_A - J_B)/2$  as a function of rates in for Co-CN (c) and Co-CNP (d).

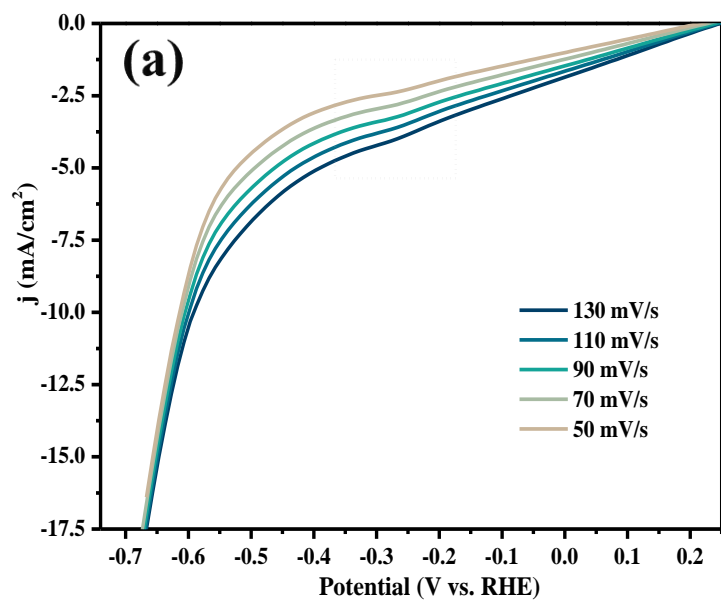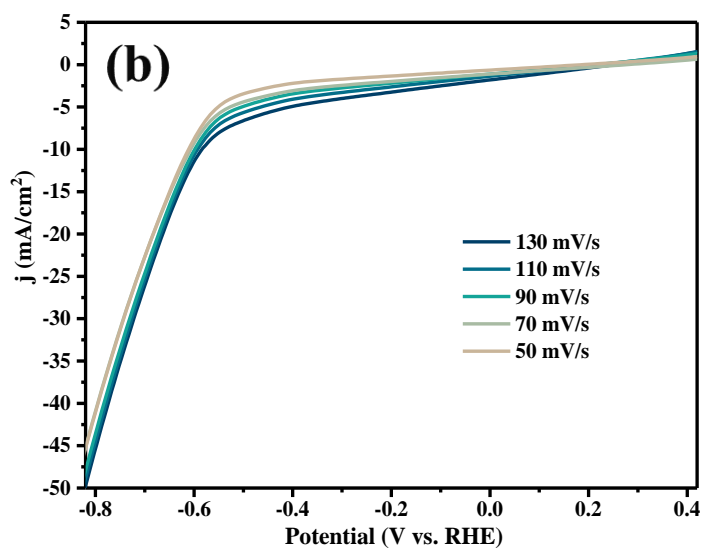

**Supplementary Figure 11.** (a) The LSV curves with different sweep rates for Co-CN at nitrate solution (a) and Co-CNP at nitrite solution (b).

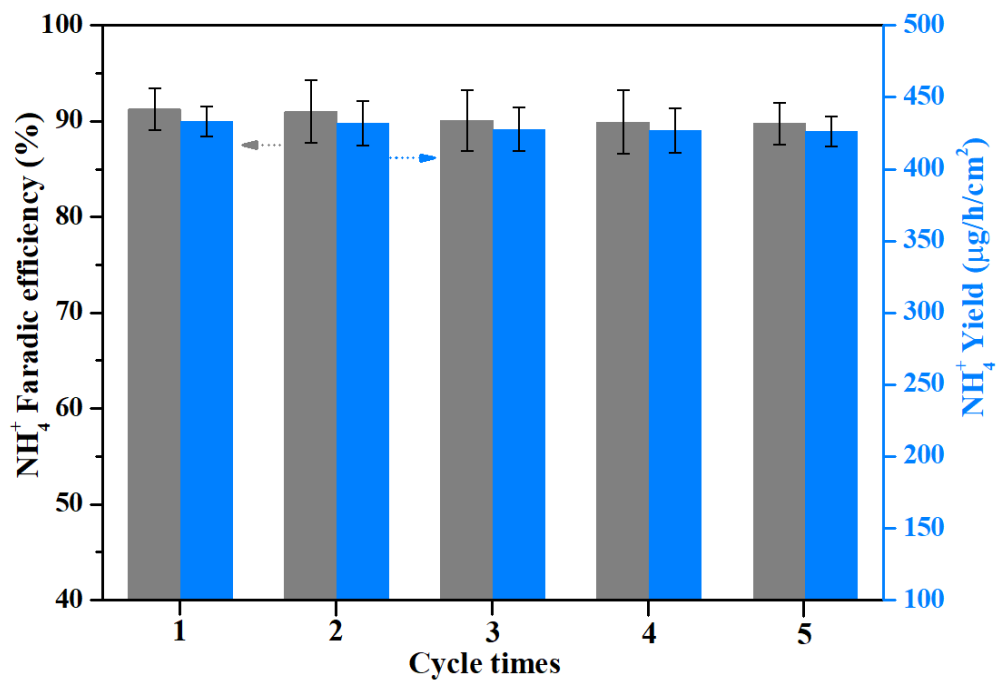

**Supplementary Figure 12.** Cycle Faradaic efficiency for NH<sub>4</sub><sup>+</sup> production and NH<sub>4</sub><sup>+</sup>-yield on Co-CNP SACs.

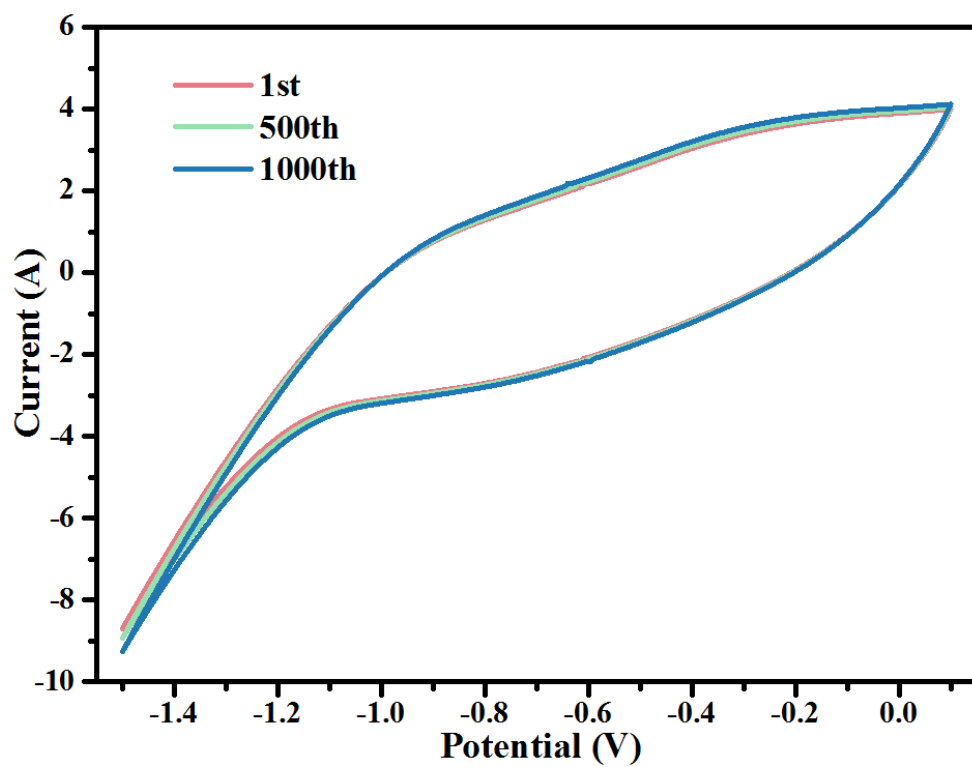

**Supplementary Figure 13.** CV results for Co-CNP with different cycle durations.

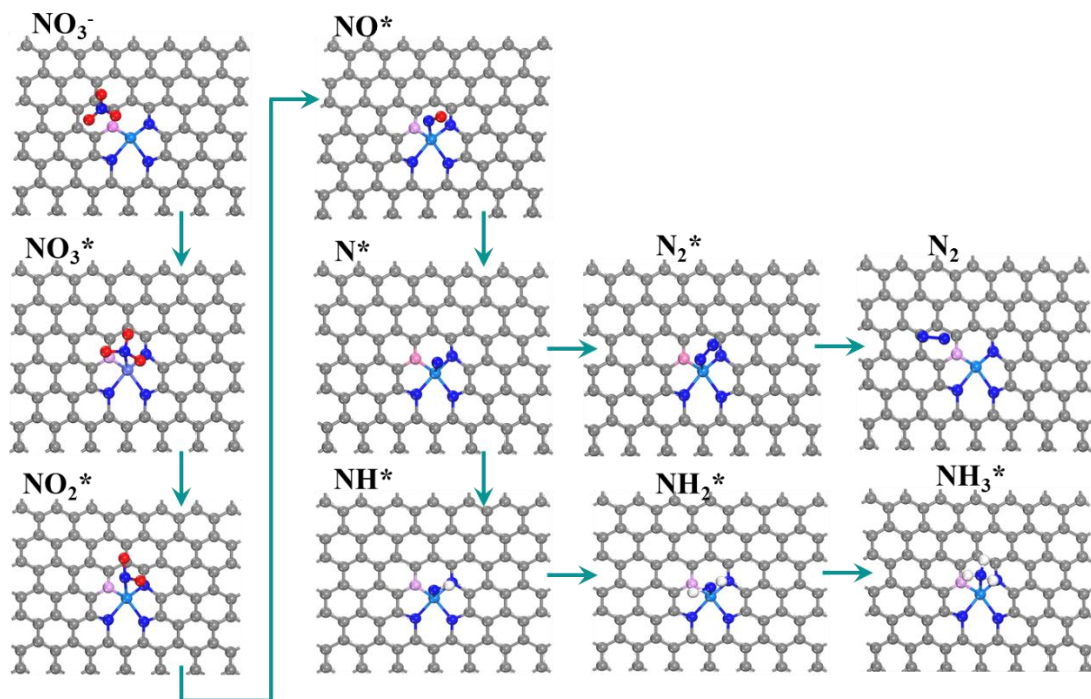

**Supplementary Figure 14.** The adsorption models on an ideal CoP<sub>1</sub>N<sub>3</sub> site

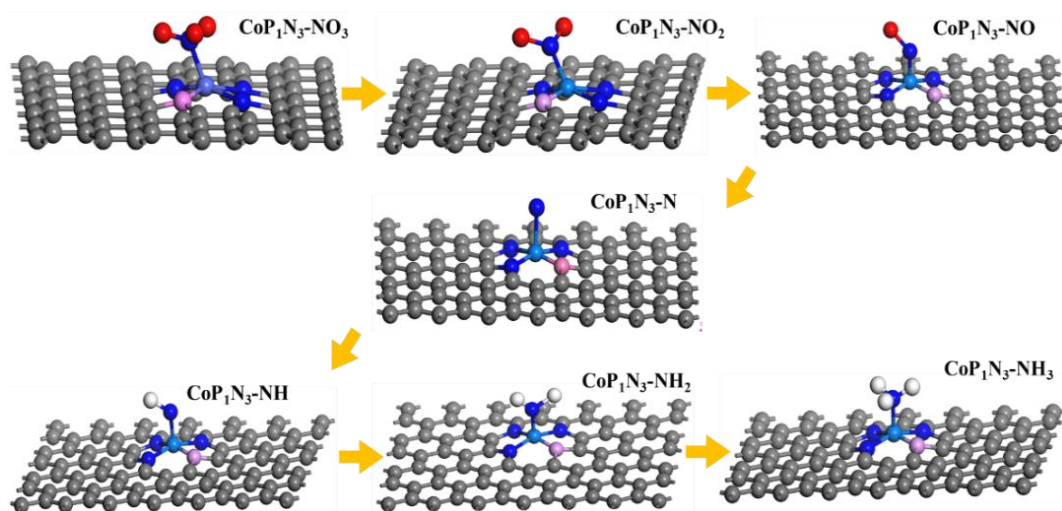

**Supplementary Figure 15.** The side-view of nitrate adsorption model on an ideal CoP<sub>1</sub>N<sub>3</sub> site



**Table S1.** EXAFS fitting parameters for various samples.

| <b>Sample</b> | <b>Shell</b> | <b>CN<sup>a</sup></b> | <b>R[Å]<sup>b</sup></b> | <b><math>\sigma^2(10^{-3})</math><sup>c</sup></b> | <b>R factor<sup>d</sup></b> |
|---------------|--------------|-----------------------|-------------------------|---------------------------------------------------|-----------------------------|
| <b>Co-CN</b>  | Cu-N         | 4.1                   | 1.92                    | 6.3                                               | 0.009                       |
| <b>Co-CNP</b> | Co-N         | 3.2                   | 1.94                    | 5.1                                               | 0.018                       |
|               | Co-P         | 0.9                   | 2.21                    | 5.1                                               |                             |

<sup>a</sup> CN is the coordination number, <sup>b</sup> R is the average bonding distance, <sup>c</sup>  $\sigma^2$  is Debye–Waller factor and <sup>d</sup> R factor represents the fitting quality.

**Table S2.** Physical and chemical properties of samples.

| Sample | $S_{\text{BET}}$ (m <sup>2</sup> /g) | $V_{\text{meso}}^{\text{a}}$ (cc/g) | $d_{\text{meso}}^{\text{a}}$ (nm) | ECSA (cm <sup>2</sup> ) |
|--------|--------------------------------------|-------------------------------------|-----------------------------------|-------------------------|
| Co-CN  | 18.0                                 | 0.07                                | 36.7                              | 0.49                    |
| Co-CNP | 35.4                                 | 0.12                                | 24.2                              | 0.79                    |

<sup>a</sup> Mesopore volume and diameter were obtained from the N<sub>2</sub>-desorption branch using the BJH method.

**Table S3.** Comparison of nitrate reduction in this study with previous reports.

| No | Cathode                     | Cathode Area (cm <sup>2</sup> ) | Anode                   | Solution conditions                                                           | NH <sub>4</sub> <sup>+</sup> -Faradaic efficiency (%) | NH <sub>4</sub> <sup>+</sup> -Yield rate                              | Ref.      |
|----|-----------------------------|---------------------------------|-------------------------|-------------------------------------------------------------------------------|-------------------------------------------------------|-----------------------------------------------------------------------|-----------|
| 1  | Fe-PPy                      | 0.25                            | -                       | 0.1 M KOH + 0.1 M KNO <sub>3</sub>                                            | 100                                                   | 2.75 mg <sub>NH<sub>3</sub></sub> ·h <sup>-1</sup> ·cm <sup>-2</sup>  | 1         |
| 2  | Cu/Cu <sub>2</sub> O        | 1                               | platinum foil           | 0.5 M Na <sub>2</sub> SO <sub>4</sub> 200 ppm nitrate-N                       | 95.8                                                  | -                                                                     | 2         |
| 3  | Fe SAC                      | 2                               | platinum foil           | 0.1 M K <sub>2</sub> SO <sub>4</sub> and 0.5 M KNO <sub>3</sub>               | 75                                                    | 0.46 mmol·h <sup>-1</sup> ·cm <sup>-2</sup>                           | 3         |
| 4  | TiO <sub>2-x</sub> nanotube | 1                               | platinum foil           | 0.5 M Na <sub>2</sub> SO <sub>4</sub> +50 ppm NO <sub>3</sub> <sup>-</sup> -N | 85                                                    | -                                                                     | 4         |
| 5  | Cu-PTCDA                    | 2                               | Platinum foil           | PBS (0.1 M, pH=7) 500 ppm of NO <sub>3</sub> <sup>-</sup>                     | 85.9                                                  | 436 ± 85 μg·h <sup>-1</sup> ·cm <sup>-2</sup>                         | 5         |
| 6  | Au/C                        | -                               | Pt wire                 | 1 mM KNO <sub>3</sub> + 0.5 M K <sub>2</sub> SO <sub>4</sub> (initial pH 3.5) | 26                                                    | (4.4 ± 0.7) × 10 <sup>2</sup> pmol·s <sup>-1</sup> ·cm <sup>-2</sup>  | 6         |
| 7  | Ti foil                     | 0.3                             | glassy carbon plate     | 0.1 M HNO <sub>3</sub> + 0.3 M KNO <sub>3</sub>                               | 82                                                    | -                                                                     | 7         |
| 8  | NiAlMn CoCu alloy           | 2                               | Pt plate                | 0.5 M KOH+0.05 M KNO <sub>3</sub>                                             | 92.2                                                  | -                                                                     | 8         |
| 9  | Co-CNP                      | 2.25                            | Ti/IrO <sub>2</sub> -Ru | 0.02 M Na <sub>2</sub> SO <sub>4</sub>                                        | 92.0                                                  | 433.3 μg <sub>NH<sub>4</sub></sub> ·h <sup>-1</sup> ·cm <sup>-2</sup> | This Work |

## References

1. Li, P. P., Jin, Z. Y., Fang, Z. W., & Yu, G. H., A single-site iron catalyst with preoccupied active center that achieves selective ammonia electrosynthesis from nitrate. *Energy Environ. Sci.* **14**, 3522-3531 (2021).
2. Wang, Y., Zhou, W., Jia, R., Yu, Y. & Zhang, B., Unveiling the activity origin of a copper-based electrocatalyst for selective nitrate reduction to ammonia. *Angew. Chem. Int. Ed.* **59**, 5350-5354 (2020).
3. Wu, Z. Y. et al. Electrochemical ammonia synthesis via nitrate reduction on Fe single atom catalyst. *Nat. Commun.* **12**, 2870-2880 (2021).
4. Jia, R. R. et al. Boosting selective nitrate electroreduction to ammonium by constructing oxygen vacancies in TiO<sub>2</sub>. *ACS Catal.* **10**, 3533-3540 (2020).
5. Chen, G.F. et al. Electrochemical reduction of nitrate to ammonia via direct eight-electron transfer using a copper–molecular solid catalyst. *Nat. Energy* **5**, 605–613 (2020).
6. Jaecheol, C. et al. Electroreduction of nitrates, nitrites, and gaseous nitrogen oxides: a potential source of ammonia in dinitrogen reduction studies. *ACS Energy Lett.* **5**, 2095–2097 (2020).
7. McEnaney, J. M. et al. Electrolyte engineering for efficient electrochemical nitrate reduction to ammonia on a titanium electrode. *ACS Sustainable Chem. Eng.* **8**, 2672–2681 (2020).
8. Lu, C., Lu, S. G., Qiu, W. H., Liu, Q. G. Electroreduction of nitrate to ammonia in alkaline solutions using hydrogen storage alloy cathodes. *Electrochimica Acta* **44**, 2193–2197 (1999).
